# Supplementary material
Source: ML conference proceedings conference paper supplement (https://proceedings.mlr.press/v48/arjevani16.html)
Supplement: Supplementary file 1 [file arjevani16-supp.pdf]

## A. Proofs

### A.1. Proof for Theorem 1

Let us apply the given oblivious  $p$ -CLI algorithm on a quadratic function of the form

$$f : \mathbb{R}^d \rightarrow \mathbb{R} : \mathbf{x} \mapsto \frac{1}{2} \mathbf{x}^\top Q \mathbf{x} + \mathbf{q}^\top \mathbf{x},$$

where  $Q = \text{diag}(\eta, \dots, \eta)$  and  $\mathbf{q} = -\mathbf{v}\eta$  for some  $\eta \in [\mu, L]$  and  $\mathbf{v} \neq 0 \in \mathbb{R}^d$ . In particular, we have that the norm of the unique minimizer is  $\|\mathbf{x}^*\| = \|-Q^{-1}\mathbf{q}\| = \|\mathbf{v}\|$ . We set the initialization points to be zero, i.e.,  $\mathbb{E}\mathbf{x}_j = 0$ ,  $j = 1, \dots, p$ , and denote the corresponding coefficients by  $A_{ij}^{(k)}, B_{ij}^{(k)} \in \mathbb{R}^{d \times d}$ . The crux of proof is that, as long as  $\eta$  lies in  $[\mu, L]$ , the side-information  $\{\mu, L\}$  is not affected, and therefore, the coefficients remain unchanged.

First, we express  $\mathbb{E}\mathbf{x}_i^{k+1}$  in terms of  $Q, \mathbf{q}$  and  $\mathbb{E}\mathbf{x}_1^{(k)}, \dots, \mathbb{E}\mathbf{x}_p^{(k)} \in \mathbb{R}^d$ . By Definition 3 we have for any  $i \in [p]$ ,

$$\begin{aligned} \mathbb{E}\mathbf{x}_i^{k+1} &= \sum_{j=1}^p \left( A_{ij}^{(k)} \partial f + B_{ij}^{(k)} \right) (\mathbb{E}\mathbf{x}_j^{(k)}) \\ &= \sum_{j=1}^p (A_{ij}^{(k)} \partial f(\mathbb{E}\mathbf{x}_j^{(k)}) + B_{ij}^{(k)} \mathbb{E}\mathbf{x}_j^{(k)}) \\ &= \sum_{j=1}^p (A_{ij}^{(k)} (Q \mathbb{E}\mathbf{x}_j^{(k)} + \mathbf{q}) + B_{ij}^{(k)} \mathbb{E}\mathbf{x}_j^{(k)}) \\ &= \sum_{j=1}^p (A_{ij}^{(k)} Q + B_{ij}^{(k)}) \mathbb{E}\mathbf{x}_j^{(k)} + \sum_{j=1}^p A_{ij}^{(k)} \mathbf{q}. \end{aligned}$$

Our next step is to reduce the problem of minimizing  $f$  to a polynomial approximation problem. We claim that for any  $k \geq 1$  and  $i \in [d]$  there exist  $d$  real polynomials  $s_{k,i,1}(\eta), \dots, s_{k,i,d}(\eta)$  of degree at most  $k-1$ , such that

$$\mathbb{E}\mathbf{x}_i^{(k)} = (s_{k,i,*}(\eta))\eta, \quad (17)$$

where

$$(s_{k,i,*}(\eta)) := (s_{k,i,1}(\eta), \dots, s_{k,i,d}(\eta))^\top.$$

Let us prove this claim using mathematical induction. For  $k=1$  we have

$$\mathbb{E}\mathbf{x}_i^{(1)} = \sum_{j=1}^p (A_{ij}^{(0)} Q + B_{ij}^{(0)}) \mathbb{E}\mathbf{x}_j^{(0)} + \sum_{j=1}^p A_{ij}^{(0)} \mathbf{q} = - \sum_{j=1}^p A_{ij}^{(0)} \mathbf{v}\eta, \quad (18)$$

showing that the base case holds. For the induction step, assume the statement holds for some  $k > 1$  with  $s_{k,i,j}(\eta)$  as above, then

$$\begin{aligned} \mathbb{E}\mathbf{x}_i^{(k+1)} &= \sum_{j=1}^p (A_{ij}^{(k)} Q + B_{ij}^{(k)}) \mathbb{E}\mathbf{x}_j^{(k)} + \sum_{j=1}^p A_{ij}^{(k)} \mathbf{q} \\ &= \sum_{j=1}^p (A_{ij}^{(k)} \text{diag}(\eta, \dots, \eta) + B_{ij}^{(k)}) (s_{k,j,*}(\eta))\eta - \sum_{j=1}^p A_{ij}^{(k)} \mathbf{v}\eta \\ &= \left( \sum_{j=1}^p (A_{ij}^{(k)} \text{diag}(\eta, \dots, \eta) + B_{ij}^{(k)}) (s_{k,j,*}(\eta)) - \sum_{j=1}^p A_{ij}^{(k)} \mathbf{v} \right) \eta. \end{aligned} \quad (19)$$

The expression inside the last parenthesis is a vector  $d$  entries, each of which contains a real polynomial of degree at most  $k$ . This concludes the induction step (note that the derivations of equalities (18) and (19) above are exactly where we use the fact that there is no functional dependency of  $A_{ij}^{(k)}$  and  $B_{ij}^{(k)}$  on  $\eta$ ).

We are now ready to estimate the sub-optimality of  $\mathbb{E}\mathbf{x}_p^{(k)}$ , the point returned by the algorithm at the  $k$ 'th iteration. Setting  $m \in \operatorname{argmax}_j |\mathbf{v}_j|$  we have

$$\left\| \mathbb{E}\mathbf{x}_p^{(k)} - \mathbf{x}^* \right\| = \|(s_{k,p,*}(\eta))\eta + \mathbf{v}\| \geq |s_{k,p,m}(\eta)\eta + v_m| = |v_m| |s_{k,p,m}(\eta)\eta/v_m + 1|. \quad (20)$$

By Lemma 2 in appendix B, there exists  $\eta \in [\mu, L]$ , such that

$$|s_{k,p,m}(\eta)\eta/v_m + 1| \geq \left( \frac{\sqrt{\kappa} - 1}{\sqrt{\kappa} + 1} \right)^k,$$

where  $\kappa = L/\mu$ . Defining  $Q$  and  $\mathbf{q}$  accordingly, and choosing, e.g.,  $\mathbf{v} = R\mathbf{e}_1$  where  $R$  denotes a prescribed distance, yields

$$\left\| \mathbb{E}\mathbf{x}_p^{(k)} - \mathbf{x}^* \right\| \geq R \left( \frac{\sqrt{\kappa} - 1}{\sqrt{\kappa} + 1} \right)^k.$$

Lastly, using the fact that  $f$  is  $\mu$ -strongly convex concludes the proof of the first part of the theorem.

For the smooth case we need to estimate  $f(\mathbb{E}\mathbf{x}_p^{(k)}) - f^*$ . Let  $\eta \in (0, L]$  and define  $Q$  and  $\mathbf{q}$ , accordingly. Inequality (20) yields

$$\begin{aligned} f(\mathbb{E}\mathbf{x}^{(k)}) - f(\mathbf{x}^*) &= \frac{1}{2} (\mathbb{E}\mathbf{x}^{(k)} - \mathbf{x}^*)^\top Q (\mathbb{E}\mathbf{x}^{(k)} - \mathbf{x}^*) \\ &\geq \frac{(v_m)^2}{2} \eta ((s_{k,p,m}(\eta)\eta/v_m + 1))^2. \end{aligned} \quad (21)$$

Now, by Lemma 3 in appendix B,

$$\min_{s(\eta), \partial s \leq k-1} \max_{\eta \in (0, L]} \eta (s(\eta)\eta + 1)^2 \geq \frac{L}{(2k+1)^2}$$

Thus, choosing  $\mathbf{v} = R\mathbf{e}_1$  concludes the proof.

## A.2. Proof for Theorem 2

The proof of this theorem follows the exact reduction used in the proof of Theorem 1 (see Appendix A.1 above). The only difference is that here  $\mu$  is allowed to be any real number in  $(0, L)$ . This consideration reduces our problem into, yet another, polynomial approximation problem. For completeness, we provide here the full proof.

Let us apply the given oblivious  $p$ -CLI algorithm on a quadratic function of the form

$$f : \mathbb{R}^d \rightarrow \mathbb{R} : \mathbf{x} \mapsto \frac{1}{2} \mathbf{x}^\top Q \mathbf{x} + \mathbf{q}^\top \mathbf{x},$$

where  $Q = \operatorname{diag}(\eta, \dots, \eta)$  and  $\mathbf{q} = -\mathbf{v}\eta$  for some  $\eta \in (0, L)$  and  $\mathbf{v} \neq 0 \in \mathbb{R}^d$ . In particular, we have that the norm of the unique minimizer is  $\|\mathbf{x}^*\| = \|-Q^{-1}\mathbf{q}\| = \|\mathbf{v}\|$ . We set the initialization points to be zero, i.e.,  $\mathbb{E}\mathbf{x}_j = 0$ ,  $j = 1, \dots, p$ , and denote the corresponding coefficients by  $A_{ij}^{(k)}, B_{ij}^{(k)} \in \mathbb{R}^{d \times d}$ . The crux of proof is that, as long as  $\eta$  lies in  $(0, L]$ , the side-information  $\{\mu, L\}$  is not affected, and therefore, the coefficients remain unchanged.

First, we express  $\mathbb{E}\mathbf{x}_i^{k+1}$  in terms of  $Q$ ,  $\mathbf{q}$  and  $\mathbb{E}\mathbf{x}_1^{(k)}, \dots, \mathbb{E}\mathbf{x}_p^{(k)} \in \mathbb{R}^d$ . By Definition 3 we have for any  $i \in [p]$ ,

$$\begin{aligned}\mathbb{E}\mathbf{x}_i^{k+1} &= \sum_{j=1}^p \left( A_{ij}^{(k)} \partial f + B_{ij}^{(k)} \right) (\mathbb{E}\mathbf{x}_j^{(k)}) \\ &= \sum_{j=1}^p (A_{ij}^{(k)} \partial f(\mathbb{E}\mathbf{x}_j^{(k)}) + B_{ij}^{(k)} \mathbb{E}\mathbf{x}_j^{(k)}) \\ &= \sum_{j=1}^p (A_{ij}^{(k)} (Q\mathbb{E}\mathbf{x}_j^{(k)} + \mathbf{q}) + B_{ij}^{(k)} \mathbb{E}\mathbf{x}_j^{(k)}) \\ &= \sum_{j=1}^p (A_{ij}^{(k)} Q + B_{ij}^{(k)}) \mathbb{E}\mathbf{x}_j^{(k)} + \sum_{j=1}^p A_{ij}^{(k)} \mathbf{q}\end{aligned}$$

Our next step is to reduce the problem of minimizing  $f$  to a polynomial approximation problem. We claim that for any  $k \geq 1$  and  $i \in [d]$  there exist  $d$  real polynomials  $s_{k,i,1}(\eta), \dots, s_{k,i,d}(\eta)$  of degree at most  $k-1$ , such that

$$\mathbb{E}\mathbf{x}_i^{(k)} = (s_{k,i,*}(\eta))\eta, \quad (22)$$

where

$$(s_{k,i,*}(\eta)) := (s_{k,i,1}(\eta), \dots, s_{k,i,d}(\eta))^\top.$$

Let us prove this claim using mathematical induction. For  $k=1$  we have,

$$\mathbb{E}\mathbf{x}_i^{(1)} = \sum_{j=1}^p (A_{ij}^{(0)} Q + B_{ij}^{(0)}) \mathbb{E}\mathbf{x}_j^{(0)} + \sum_{j=1}^p A_{ij}^{(0)} \mathbf{q} = - \sum_{j=1}^p A_{ij}^{(0)} \mathbf{v} \eta, \quad (23)$$

showing that the base case holds. For the induction step, assume the statement holds for some  $k > 1$  with  $s_{k,i,j}(\eta)$  as above, then

$$\begin{aligned}\mathbb{E}\mathbf{x}_i^{(k+1)} &= \sum_{j=1}^p (A_{ij}^{(k)} Q + B_{ij}^{(k)}) \mathbb{E}\mathbf{x}_j^{(k)} + \sum_{j=1}^p A_{ij}^{(k)} \mathbf{q} \\ &= \sum_{j=1}^p (A_{ij}^{(k)} \text{diag}(\eta, \dots, \eta) + B_{ij}^{(k)}) (s_{k,j,*}(\eta))\eta - \sum_{j=1}^p A_{ij}^{(k)} \mathbf{v} \eta \\ &= \left( \sum_{j=1}^p (A_{ij}^{(k)} \text{diag}(\eta, \dots, \eta) + B_{ij}^{(k)}) (s_{k,j,*}(\eta)) - \sum_{j=1}^p A_{ij}^{(k)} \mathbf{v} \right) \eta.\end{aligned} \quad (24)$$

The expression inside the last parenthesis is a vector  $d$  entries, each of which contains a real polynomial of degree at most  $k$ . This concludes the induction step. (note that the derivations of equalities (23) and (24) above are exactly where we use the fact that there is no functional dependency of  $A_{ij}^{(k)}$  and  $B_{ij}^{(k)}$  on  $\eta$ ).

We are now ready to estimate the sub-optimality of  $\mathbb{E}\mathbf{x}_p^{(k)}$ , the point returned by the algorithm at the  $k$ 'th iteration. Let us set  $m \in \text{argmax}_j |\mathbf{v}_j|$ , then

$$\begin{aligned}\left\| \mathbb{E}\mathbf{x}_p^{(k)} - \mathbf{x}^* \right\| &= \left\| (s_{k,p,*}(\eta))\eta + \mathbf{v} \right\| \\ &\geq |s_{k,p,m}(\eta)\eta + v_m| \\ &= |v_m| |s_{k,p,m}(\eta)\eta/v_m + 1|.\end{aligned} \quad (25)$$

By Lemma 4, there exists  $\eta \in (L/2, L)$ , such that

$$|s_{k,p,m}(\eta)\eta/v_m + 1| \geq (1 - \eta/L)^{k+1}. \quad (26)$$

Defining  $Q$  and  $\mathbf{q}$  accordingly, and choosing, e.g.,  $\mathbf{v} = R\mathbf{e}_1$  where  $R$  denotes a prescribed distance, yields

$$\left\| \mathbb{E}\mathbf{x}_p^{(k)} - \mathbf{x}^* \right\| \geq (1 - \eta/L)^{k+1}.$$

Using the fact that  $f$  is  $L/2$ -strongly convex concludes the proof.

## B. Technical Lemmas

Below, we provide 3 lemmas which are used to bound from below the quantity  $|s(\eta)\eta + 1|$  over different domains of  $\eta$ , where  $s(\eta)$  is a real polynomial. For brevity, we denote the set of real polynomials of degree  $k$  by  $\mathcal{P}_k$ .

**Lemma 2.** *Let  $s(\eta) \in \mathcal{P}_k$ , and let  $0 < \mu < L$ . Then,*

$$\max_{\eta \in [\mu, L]} |s(\eta)\eta + 1| \geq \left( \frac{\sqrt{\kappa} - 1}{\sqrt{\kappa} + 1} \right)^{k+1}$$

where  $\kappa := L/\mu$ .

**Proof** Denote  $q(\eta) := T_{k+1}^{-1} \left( \frac{L+\mu}{L-\mu} \right) T_{k+1} \left( \frac{2\eta-\mu-L}{L-\mu} \right)$ , where  $T_k(\eta)$  denotes the Chebyshev polynomial of degree  $k$ ,

$$T_k(\eta) = \begin{cases} \cos(k \arccos(\eta)) & |\eta| \leq 1 \\ \cosh(k \operatorname{arcosh}(\eta)) & \eta \geq 1 \\ (-1)^n \cosh(k \operatorname{arcosh}(-\eta)) & \eta \leq -1. \end{cases} \quad (27)$$

It follows that  $|T_{k+1}(\eta)| \leq 1$  for  $\eta \in [-1, 1]$  and

$$T_{k+1}(\cos(j\pi/(k+1))) = (-1)^j, \quad j = 0, \dots, k+1.$$

Accordingly,  $|q(\eta)| \leq T_{k+1}^{-1} \left( \frac{L+\mu}{L-\mu} \right)$ ,  $\eta \in [\mu, L]$  and

$$q(\theta_j) = (-1)^j T_{k+1}^{-1} \left( \frac{L+\mu}{L-\mu} \right), \quad j = 0, \dots, k+1,$$

where

$$\theta_j = \frac{\cos(j\pi/(k+1))(L-\mu) + \mu + L}{2}.$$

Suppose, for the sake of contradiction, that

$$\max_{\eta \in [\mu, L]} |s(\eta)\eta + 1| < \max_{\eta \in [\mu, L]} |q(\eta)|.$$

Thus, for  $r(\eta) = q(\eta) - (1 + s(\eta)\eta)$ , we have  $r(\theta_j) > 0$  for even  $j$ , and  $r(\theta_j) < 0$  for odd  $j$ . Hence,  $r(\eta)$  has  $k+1$  roots in  $[\mu, L]$ . But, since  $r(0) = 0$  and  $\mu > 0$ , it follows  $r(\eta)$  has at least  $k+2$  roots, which contradicts the fact that the degree of  $r(\eta)$  is at most  $k+1$ . Therefore,

$$\max_{\eta \in [\mu, L]} |s(\eta)\eta + 1| \geq \max_{\eta \in [\mu, L]} |q(\eta)| = T_{k+1}^{-1} \left( \frac{\kappa+1}{\kappa-1} \right),$$

where  $\kappa = L/\mu$ . Since  $(\kappa+1)/(\kappa-1) \geq 1$ , we have by Equation (27),

$$\begin{aligned} T_k \left( \frac{\kappa+1}{\kappa-1} \right) &= \cosh \left( k \operatorname{arcosh} \left( \frac{\kappa+1}{\kappa-1} \right) \right) \\ &= \cosh \left( k \ln \left( \frac{\kappa+1}{\kappa-1} + \sqrt{\left( \frac{\kappa+1}{\kappa-1} \right)^2 - 1} \right) \right) \\ &= \cosh \left( k \ln \left( \frac{\kappa + 2\sqrt{\kappa} + 1}{\kappa - 1} \right) \right) \\ &= \cosh \left( k \ln \left( \frac{\sqrt{\kappa} + 1}{\sqrt{\kappa} - 1} \right) \right) \\ &= \frac{1}{2} \left( \left( \frac{\sqrt{\kappa} + 1}{\sqrt{\kappa} - 1} \right)^k + \left( \frac{\sqrt{\kappa} - 1}{\sqrt{\kappa} + 1} \right)^k \right) \\ &\leq \left( \frac{\sqrt{\kappa} + 1}{\sqrt{\kappa} - 1} \right)^k. \end{aligned}$$

Hence,

$$\max_{\eta \in [\mu, L]} |s(\eta)\eta + 1| \geq \left( \frac{\sqrt{\kappa} - 1}{\sqrt{\kappa} + 1} \right)^{k+1}$$

■

**Lemma 3.** *Let  $s(\eta) \in \mathcal{P}_k$ , and let  $0 < L$ . Then,*

$$\max_{\eta \in [0, L]} \eta |s(\eta)\eta + 1|^2 \geq \frac{L}{(2k + 3)^2}$$

**Proof** First, we define

$$q(\eta) = \begin{cases} (-1)^k (2k + 3)^{-1} \sqrt{L/\eta} T_{2k+3}(\sqrt{\eta/L}) & \eta \neq 0 \\ 0 & \eta = 0 \end{cases}$$

where  $T_k(\eta)$  is the  $k$ 'th Chebyshev polynomial (see (27)). Let us show that  $q(\eta)$  is a polynomial of degree  $k + 1$  and that  $q(0) = 1$ . The following trigonometric identity

$$\cos \alpha + \cos \beta = 2 \cos \left( \frac{\alpha - \beta}{2} \right) \cos \left( \frac{\alpha + \beta}{2} \right)$$

together with (27), yields the following recurrence formula

$$T_k(\eta) = 2\eta T_{k-1}(\eta) - T_{k-2}(\eta).$$

Noticing that  $T_0(\eta) = 1$  and  $T_1(\eta) = x$  (also by (27)), we can use mathematical induction to prove that Chebyshev polynomials of odd degree have only odd powers and that the corresponding coefficient for the first power  $\eta$  in  $T_{2k+3}(\eta)$  is indeed  $(-1)^k (2k + 3)$ . Equivalently, we get that  $q(\eta)$  is a polynomial of degree  $k + 1$  and that  $q(0) = 1$ . Next, note that for

$$\theta_j = L \cos \left( \frac{j\pi}{2k + 3} \right)^2 \in [0, L], \quad j = 0, \dots, k + 1$$

we have

$$\max_{\eta \in [0, L]} \eta^{1/2} |q(\eta)| = (-1)^j \theta_j^{1/2} q(\theta_j) = \frac{\sqrt{L}}{2k + 3}.$$

Now, suppose, for the sake of contradiction, that

$$\max_{\eta \in [0, L]} \eta |s(\eta)\eta + 1|^2 < \max_{\eta \in [0, L]} \eta |q(\eta)|^2.$$

In particular,

$$\theta_j^{1/2} |s(\theta_j)\theta_j^{1/2} + 1| < \theta_j^{1/2} |q(\theta_j)|.$$

Since  $\theta_j > 0$ , we have

$$|s(\theta_j)\theta_j^{1/2} + 1| < |q(\theta_j)|.$$

We proceed in a similar way to the proof of Lemma 2. For  $r(\eta) = q(\eta) - (1 + s(\eta)\eta)$ , we have  $r(\theta_j) > 0$  for even  $j$ , and  $r(\theta_j) < 0$  for odd  $j$ . Hence,  $r(\eta)$  has  $k + 1$  roots in  $[\theta_{k+1}, L]$ . But, since  $r(0) = 0$  and  $\theta_{k+1} > 0$ , it follows  $r(\eta)$  has at least  $k + 2$  roots, which contradicts the fact that degree of  $r(\eta)$  is at most  $k + 1$ .

Therefore,

$$\max_{\eta \in [0, L]} \eta |s(\eta)\eta + 1|^2 \geq \max_{\eta \in [0, L]} \eta |q(\eta)|^2 \geq \frac{L}{(2k+3)^2}$$

which concludes the proof. ■

**Lemma 4.** *Let  $s(\eta) \in \mathcal{P}_k$ , and let  $0 < L$ . Then exactly one of the two following holds:*

1. *For any  $\epsilon > 0$ , there exists  $\eta \in (L - \epsilon, L)$  such that*

$$|s(\eta)\eta + 1| > (1 - \eta/L)^{k+1}.$$

2.  *$s(\eta)\eta + 1 = (1 - \eta/L)^{k+1}$ .*

**Proof** It suffices to show that if (1) does not hold then  $s(\eta)\eta + 1 = (1 - \eta/L)^{k+1}$ . Suppose that there exists  $\epsilon > 0$  such that for all  $\eta \in (L - \epsilon, L)$  it holds that

$$|s(\eta)\eta + 1| \leq \left(1 - \frac{\eta}{L}\right)^{k+1}.$$

Define

$$q(\eta) := s(L(1 - \eta))L(1 - \eta) + 1 \tag{28}$$

and denote the corresponding coefficients by  $q(\eta) = \sum_{j=0}^{k+1} q_j \eta^j$ . We show by induction that  $q_j = 0$  for all  $j = 0, \dots, k$ . For  $j = 0$  we have that since for any  $\eta \in (0, 1 - (L - \epsilon)/L)$

$$|q(\eta)| \leq \left(1 - \frac{L(1 - \eta)}{L}\right)^{k+1} = \eta^{k+1},$$

it holds that

$$|q_0| = |q(0)| = \left| \lim_{\eta \rightarrow 0^+} q(\eta) \right| \leq \lim_{\eta \rightarrow 0^+} \eta^{k+1} = 0.$$

Now, if  $q_0 = \dots = q_{m-1} = 0$  for  $m < k + 1$  then

$$|q_m| = \left| \frac{q(0)}{\eta^m} \right| = \left| \lim_{\eta \rightarrow 0^+} \frac{q(\eta)}{\eta^m} \right| \leq \lim_{\eta \rightarrow 0^+} \eta^{k+1-m} = 0.$$

Thus, proving the induction claim. This, in turns, implies that  $q(\eta) = q_{k+1}\eta^{k+1}$ . Now, by Equation (28), it follows that  $q_{k+1} = q(1) = 1$ . Hence,  $q(\eta) = \eta^{k+1}$ . Lastly, using Equation (28) again yields

$$s(\eta)\eta + 1 = q\left(1 - \frac{\eta}{L}\right) = \left(1 - \frac{\eta}{L}\right)^{k+1},$$

concluding the proof. ■
